# Supplementary material for: Unsteady Mass Transfer in Bubble Wakes Analyzed by Lagrangian Coherent Structures in a Flat-Bed Reactor
Source: MDPI journal article supplement (doi:10.3390/pr10122686), 2022-12-13
Supplement: s1 [file s1]

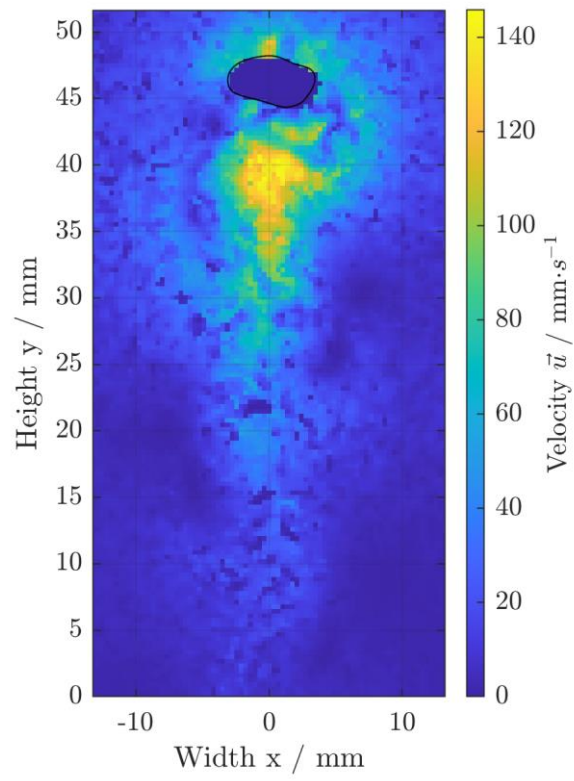

Figure S1: Unprocessed velocity field for the case of the wobbling bubble.

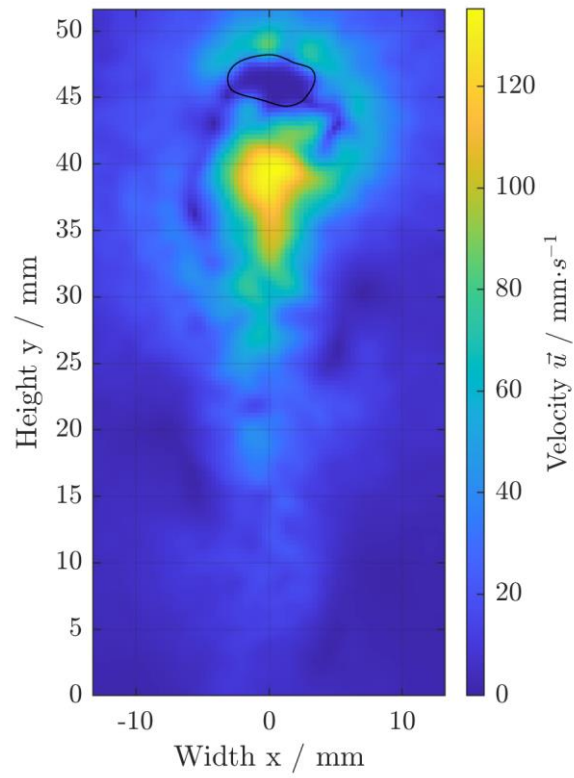

Figure S2: Smoothed velocity field for the case of the wobbling bubble.

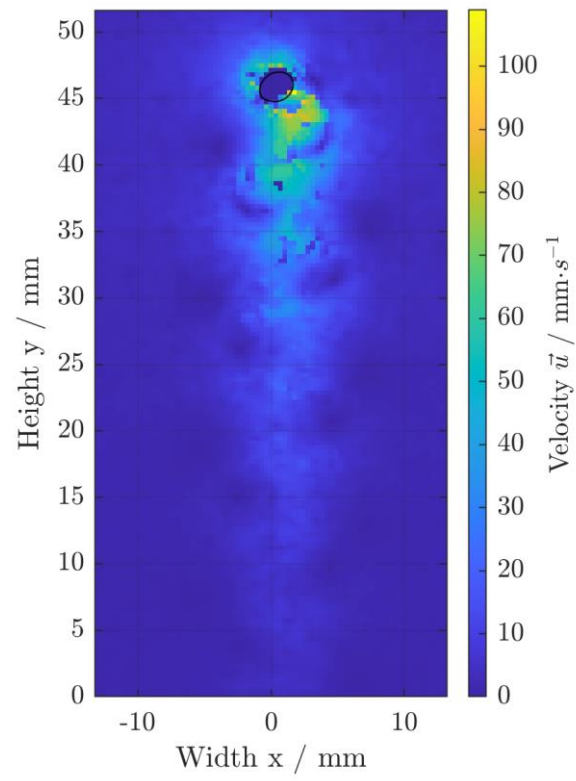

Figure S3: Unprocessed velocity field for the case of the ellipsoidal bubble.

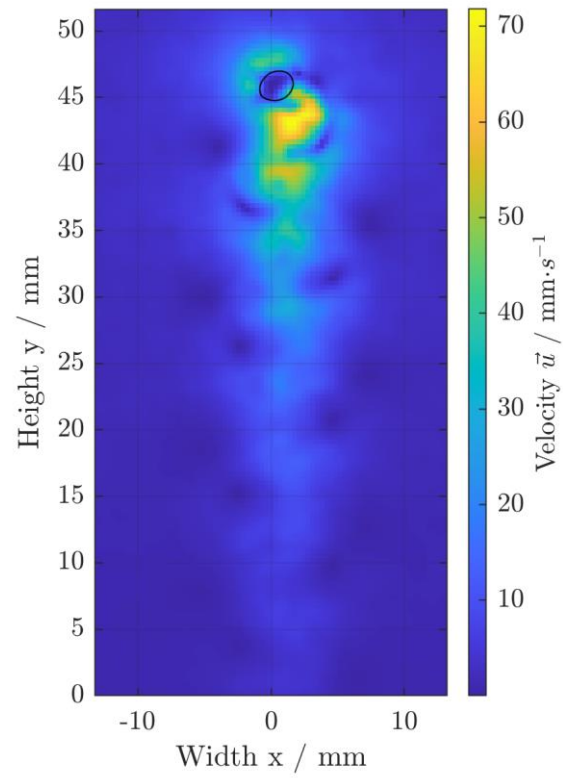

Figure S4: Smoothed velocity field for the case of the ellipsoidal bubble.

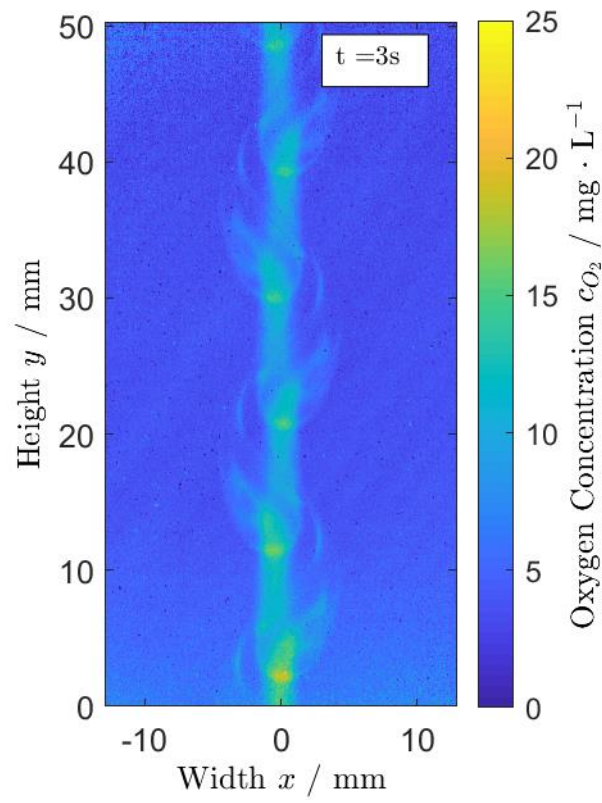

Figure S5: Concentration field in the wake of the wobbling bubble for  $t = 3$  s.

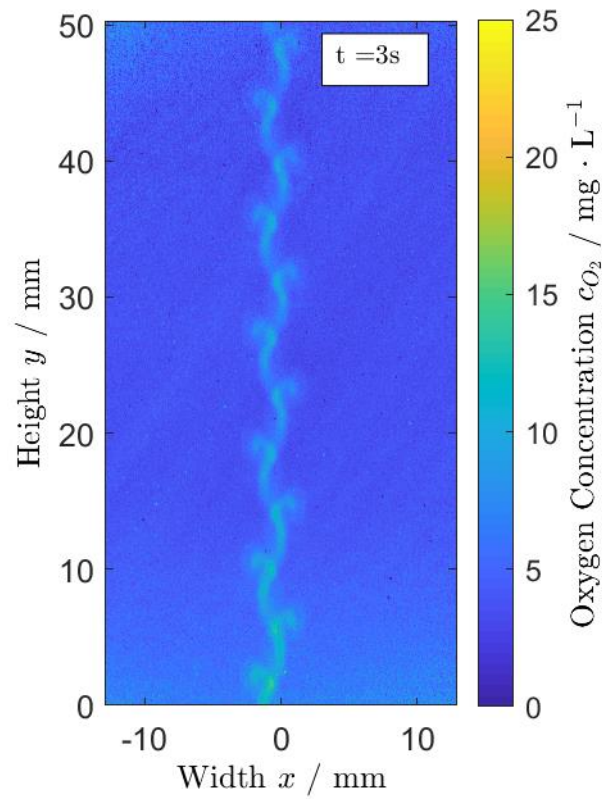

Figure S6: Concentration field in the wake of the ellipsoidal bubble for  $t = 3$  s.

*Table S1: Parameters used for the PIV image analysis in PIVview 2c V3.62 (PIVTEC GmbH, Germany).*

| Parameter                            | Value                                   |
|--------------------------------------|-----------------------------------------|
| <b>Sample</b>                        |                                         |
| Window Size / px                     | 64 x 64                                 |
| Step Size / px                       | Horizontal: 26; Vertical: 26            |
| <b>Correlate</b>                     |                                         |
| Correlation Mode                     | Standard (FTT) correlation              |
| Number of repetitions                | 1                                       |
| <b>Algorithm</b>                     |                                         |
| Interrogation method                 | Multi-pass interrogation                |
| Number of iterations                 | 3                                       |
| Sub-pixel image shifting             | Enable, on all passes                   |
| Scheme                               | B-Spline interpolation                  |
| Order                                | 4                                       |
| <b>Peak Search</b>                   |                                         |
| Sub-Pixel Peak Fit                   | Least squares Gauss fit (3x3)           |
| <b>Validate</b>                      |                                         |
| Maximum displacement test / px       | 25                                      |
| Maximum displacement difference / px | 5                                       |
| <b>Convert</b>                       |                                         |
| Pulse Delay / ms                     | 4                                       |
| Magnification Factor                 | 41.563 (24.06 $\mu\text{m}/\text{px}$ ) |
| Length unit                          | Mm                                      |
| Displacement unit                    | $\mu\text{m}$                           |
| Velocity unit                        | mm/s                                    |
